# Supplementary material for: Unraveling the role of the enigmatic MatK maturase in chloroplast group IIA intron excision
Source: PubMed Central journal article supplement — Plant Direct. 2020 Mar 13;4(3):e00208. doi: 10.1002/pld3.208 (PMC7068846; doi:10.1002/pld3.208), 2020-03-13
Supplement: PLD3-4-e00208-s004.pdf [file PLD3-4-e00208-s004.pdf]

**Table S1.** Primers used for generation of RNA precursor substrates, assessment of spliced product, un-spliced substrate, and total cDNA from self-excision and maturase activity assays, and qPCR standards. Annealing temperatures and expected product sizes are given.

| <b>Substrate</b>                                       | <b>Forward primer</b>                                            | <b>Reverse primer</b>                                          | <b>Expected product size</b> | <b>T<sub>A</sub></b> |
|--------------------------------------------------------|------------------------------------------------------------------|----------------------------------------------------------------|------------------------------|----------------------|
| <b>RNA precursor substrates</b>                        |                                                                  |                                                                |                              |                      |
| <i>Rps12-2</i>                                         | <i>rps12</i> exon3'splice For<br>GTTGCCAGAGTACGATTA <sup>1</sup> | <i>rps12</i> exon3'splice Rev<br>TGCTTTTTGACCCATA <sup>2</sup> | 753 bp                       | 48 °C                |
| <i>Rpl2</i>                                            | <i>rpl2</i> splice For<br>CAAGTGAAATCCAATCC <sup>1</sup>         | <i>rpl2</i> splice Rev<br>CGTTTACCTAGCCAACA <sup>2</sup>       | 1247 bp                      | 48 °C                |
| <b>Spliced product assessment from activity assays</b> |                                                                  |                                                                |                              |                      |
| <i>Rps12-2</i>                                         | <i>rps12</i> exon3'splice For<br>GTTGCCAGAGTACGATTA              | <i>rps12</i> intron2 span Rev<br>CCCATATTTAGAACGCC             | 190 bp                       | 50 °C                |
| <i>Rpl2</i>                                            | <i>rpl2</i> intronspan F<br>CTACCTTTGACCGATATGC                  | <i>rpl2</i> splice Rev<br>CGTTTACCTAGCCAACA                    | 240 bp                       | 50 °C                |

| <b>qPCR standards</b>                  |                                 |                                |        |       |
|----------------------------------------|---------------------------------|--------------------------------|--------|-------|
| <i>Rps12-2</i>                         | <i>rps12</i> exon3'splice For   | <i>rps12</i> exon3'splice Rev  | 212 bp | 48 °C |
|                                        | GTTGCCAGAGTACGATTA <sup>1</sup> | TGCTTTTTGACCCCAT <sup>2</sup>  |        |       |
| <i>Rpl2</i>                            | <i>rpl2</i> splice For          | <i>rpl2</i> splice Rev         | 584 bp | 48 °C |
|                                        | CAAGTGAAATCCAATCC <sup>1</sup>  | CGTTTACCTAGCCAACA <sup>2</sup> |        |       |
| <b>Detection of un-spliced product</b> |                                 |                                |        |       |
| <i>Rps12</i>                           | <i>rps12</i> exon3'splice For   | <i>Rps12in2</i> Rev            | 277 bp | 52 °C |
|                                        | GTTGCCAGAGTACGATTA              | GTTAGCCATACACTTCACA            |        |       |
| <i>Rpl2</i>                            | <i>rpl2</i> splice For          | <i>rpl2</i> exon1-intron Rev   | 472 bp | 48 °C |
|                                        | CAAGTGAAATCCAATCC               | CTTGCTGCCGTTACTCA              |        |       |
| <b>Detection of Total RNA</b>          |                                 |                                |        |       |
| <i>Rps12</i>                           | <i>rps12</i> exon3'splice For   | <i>Rps12</i> exon2Rev          | 168 bp | 52 °C |
|                                        | GTTGCCAGAGTACGATTA              | TACTGCGACAGCATCTAG             |        |       |
| <i>Rpl2</i>                            | <i>rpl2</i> splice For          | <i>rpl2</i> exon1Rev           | 225 bp | 48 °C |
|                                        | CAAGTGAAATCCAATCC               | CCCATAGTGTATGAGACA             |        |       |

<sup>1</sup> Gateway *attB1* primer sequence GGGGACAAGTTTGTACAAAAAAGCAGGCTTC added to forward primer to facilitate BP cloning.

<sup>2</sup> Gateway *attB2* primer sequence GGGGACCACTTTGTACAAGAAAGCTGGGTT added to reverse primer to facilitate BP cloning.
