# Supplementary figures and images for: Unraveling the role of the enigmatic MatK maturase in chloroplast group IIA intron excision
Source: PubMed Central journal article supplement — Plant Direct. 2020 Mar 13;4(3):e00208. doi: 10.1002/pld3.208 (PMC7068846; doi:10.1002/pld3.208), 2020-03-13

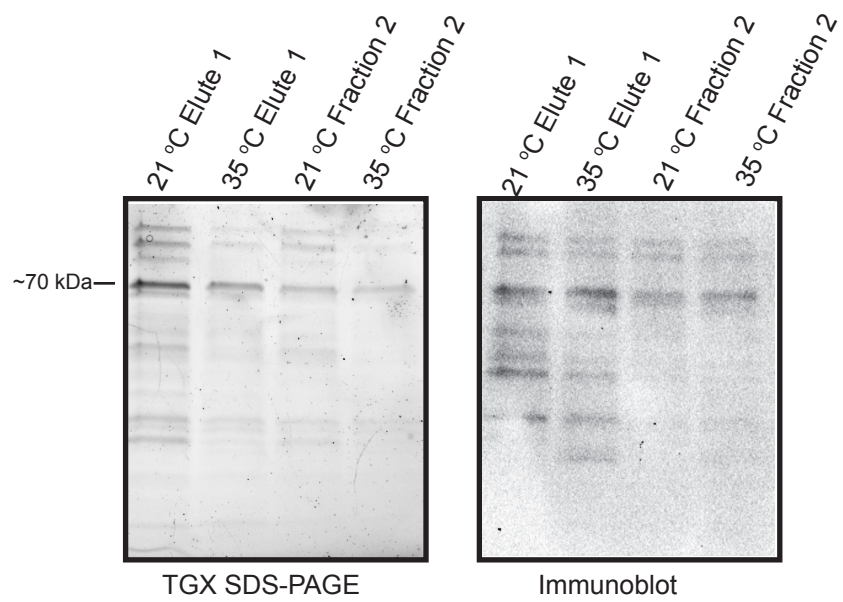

**FIGURE S2.**

Supplement: PLD3-4-e00208-s002.pdf [file PLD3-4-e00208-s002.pdf]

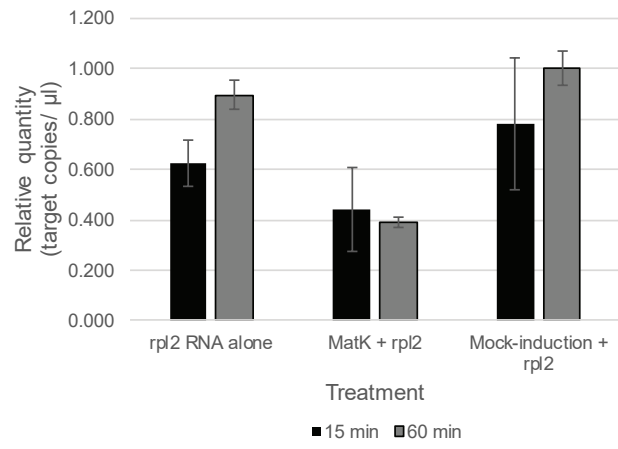

**FIGURE S3**

Supplement: PLD3-4-e00208-s003.pdf [file PLD3-4-e00208-s003.pdf]
